# Supplementary material for: Polyacrylate-GnRH Peptide Conjugate as an Oral Contraceptive Vaccine Candidate
Source: MDPI journal article supplement (doi:10.3390/pharmaceutics13071081), 2021-07-15
Supplement: s1 [file s1]

# Supplementary Materials: Polyacrylate-GnRH Peptide Conjugate as an Oral Contraceptive Vaccine Candidate

Mohammad Omer Faruck, Prashamsa Koirala, Jieru Yang, Michael J. D'Occhio, Mariusz Skwarczynski and Istvan Toth

**Table S1.** Element microanalysis of PMA, 1 and 2.

| Conjugates      | Theorital Value |       |           | Experimental Value |       |           |
|-----------------|-----------------|-------|-----------|--------------------|-------|-----------|
|                 | N%              | C%    | N/C ratio | N%                 | C%    | N/C ratio |
| PMA             | 1.53            | 55.00 | 0.028     | 1.51               | 54.80 | 0.028     |
| PMA-P-GnRH (1)  | 10.27           | 49.81 | 0.206     | 10.19              | 49.80 | 0.204     |
| PMA-PT-GnRH (2) | 10.84           | 55.18 | 0.197     | 10.73              | 54.89 | 0.196     |

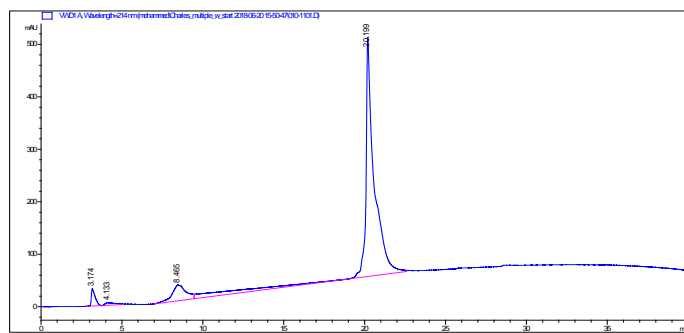

(a)

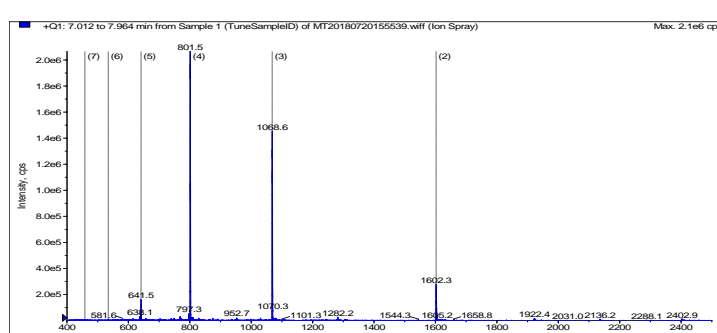

(b)

**Figure S1.** Analysis of purified compound PADRE-GnRH with alkyne moiety (a) HPLC (b)ESI-MS. HPLC, C18 column,  $t_R$  20.1 min, purity 96%, yield 43%. Analytical RP-HPLC graphs show pure compounds in single peak. The mass from these peaks, matched to the desired.

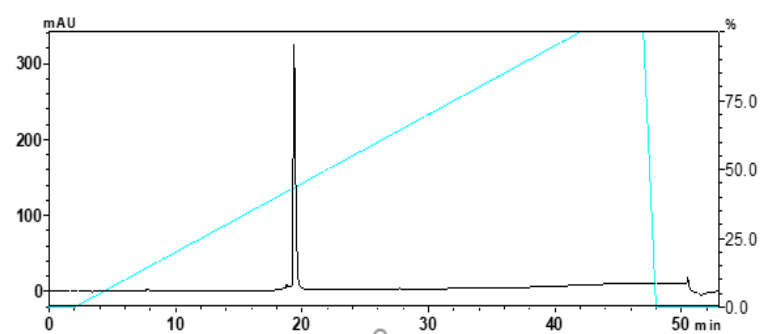

(a)

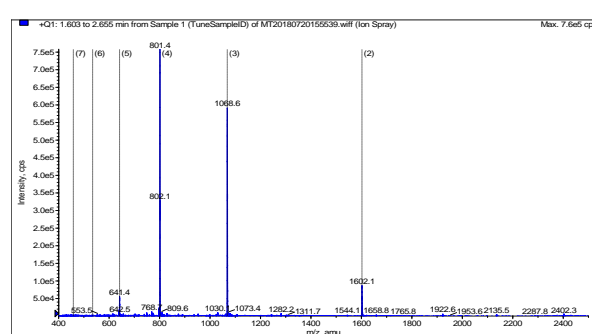

(b)

**Figure S2.** Analysis of purified compound pig T helper-GnRH with alkyne moiety (a) HPLC (b)ESI-MS. HPLC, C18 column, HPLC C18 column,  $t_R$  19.8 min, purity 99%, yield 43% Analytical RP-HPLC graphs show pure compounds in single peak. The mass from these peaks, matched to the desired compounds in ESI-MS.

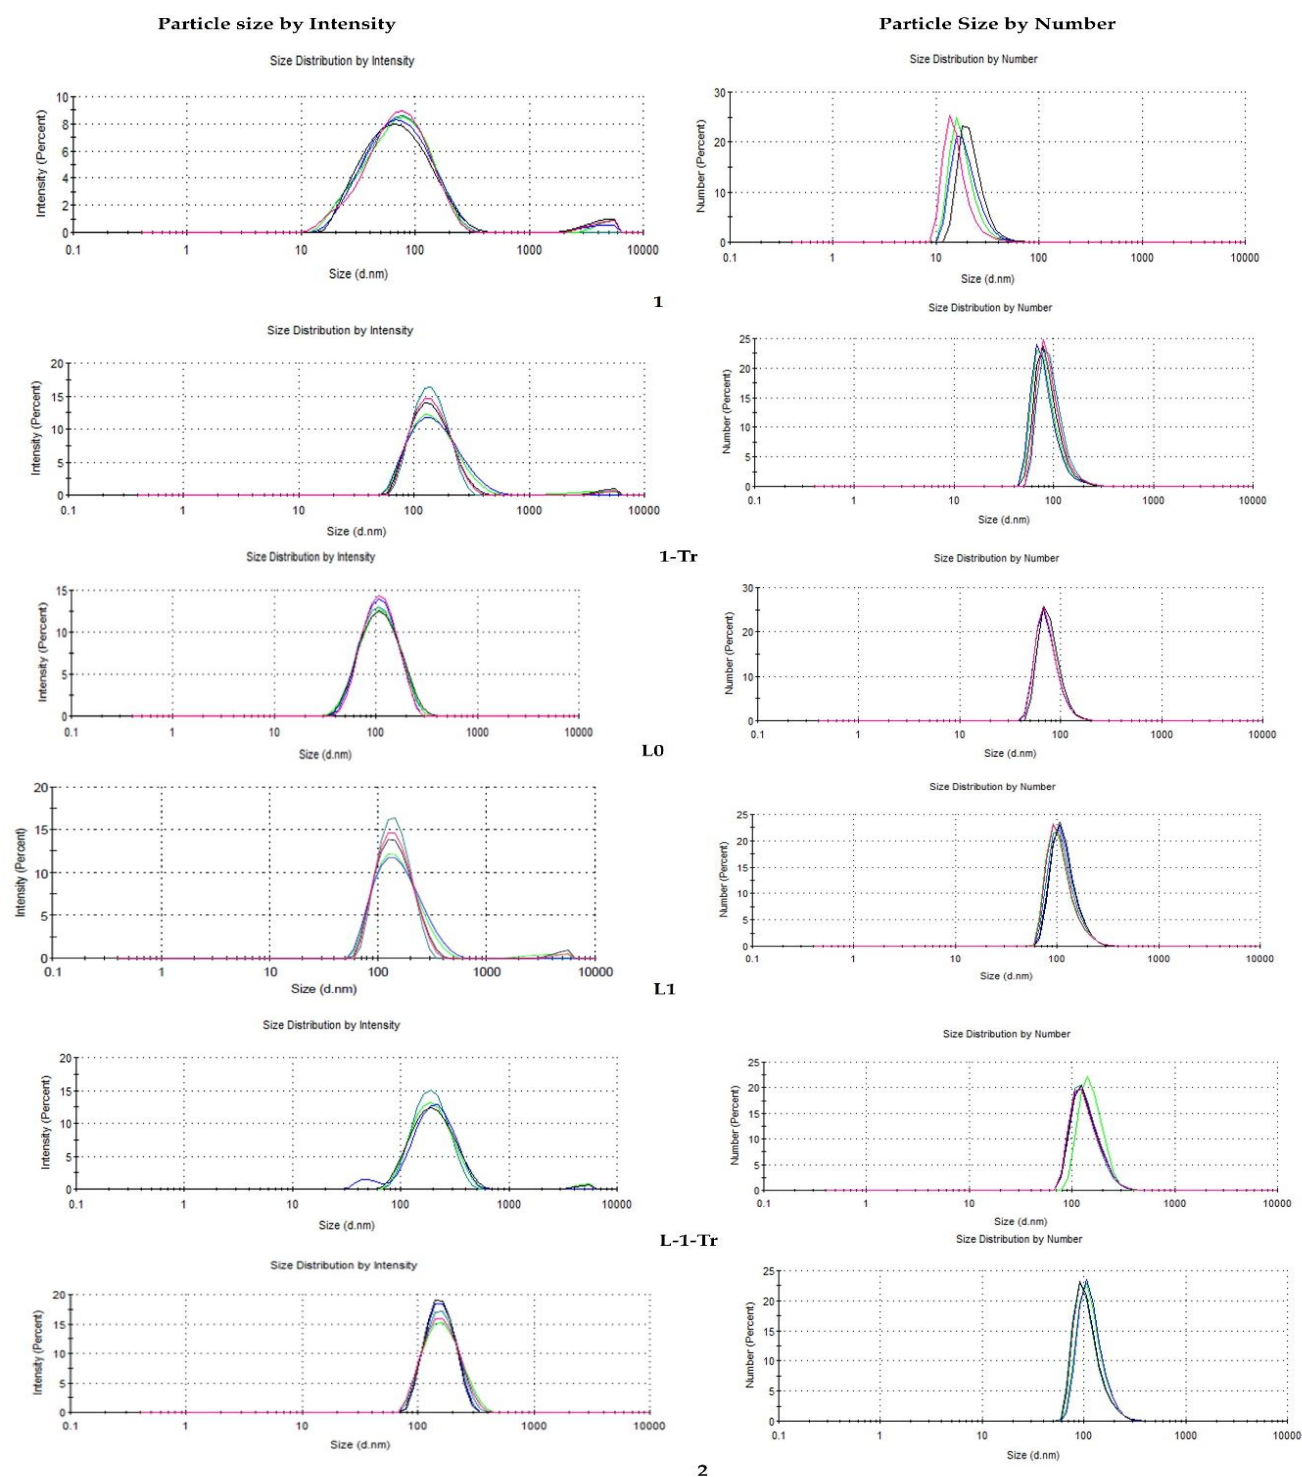

**Figure S3.** Particle size distribution by intensity and Particle size distribution by number of all vaccine compounds. **1** particle size  $62 \pm 1$  nm PDI  $0.36 \pm 0.03$ , compound **1-Tr** particle size  $140 \pm 4$  nm, PDI  $0.19 \pm 0.07$ , **L-0** particle size  $99 \pm 1$  nm, PDI  $0.14 \pm 0.03$ , **L-1** particle size  $146 \pm 2$  nm, PDI  $0.19 \pm 0.04$ , **L-1-Tr** particle size  $171 \pm 2$  nm, PDI  $0.22 \pm 0.09$ , Compound **2** particle size  $141 \pm 5$  nm, PDI  $0.08 \pm 0.02$ .

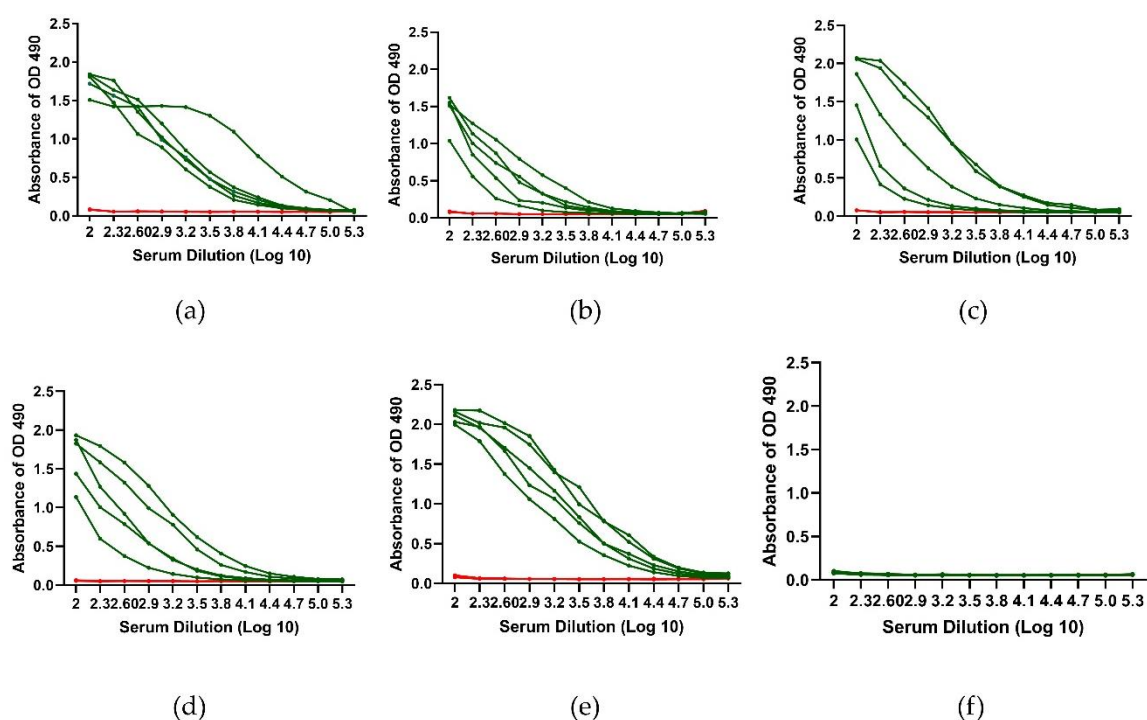

**Figure S4.** GnRH-Specific antibody (IgG) responses following subcutaneous administration of the vaccine candidates in mice. Optical density (OD) value from ELISA analysis of log serum dilution after single immunization (a) 1, (b) 1-Tr, (c) L-1, (d) L-1-Tr, (e) 1+CF, (f) PBS.

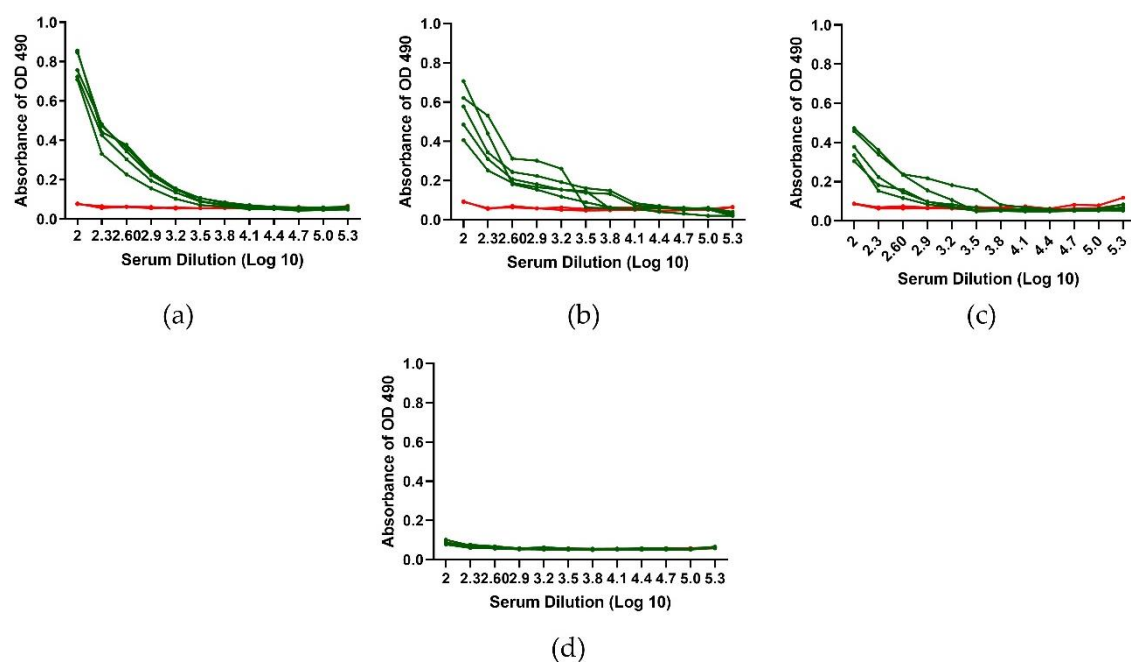

**Figure S5.** GnRH-Specific antibody (IgG) responses following subcutaneous administration of the vaccine candidates in mice. Optical density (OD) value from ELISA analysis of log serum dilution after single immunization (a) 1, (b) 1-Tr, (c) 1+CTB, (d) PBS.

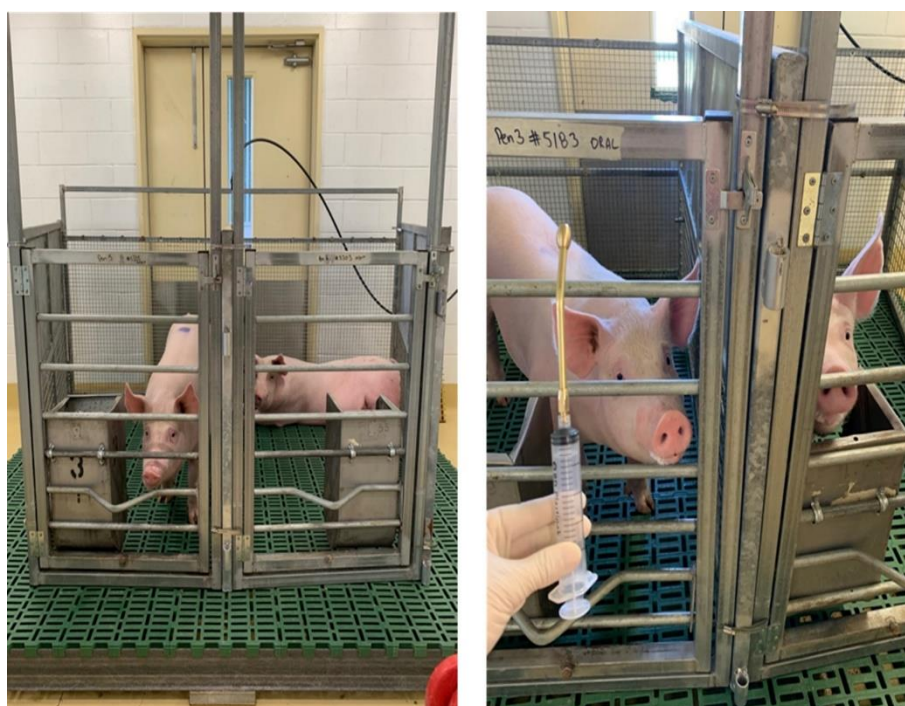

**Figure S6.** Female Large White pigs were used for the injection and oral vaccine study (left panel). Oral vaccine was delivered by gavage using a Shoof Luer-Lock (206 285) drench nozzle (right panel).
